# Supplementary material
Source: publisher figshare collection journal article supplement (https://frontiersin.figshare.com/ndownloader/files/23042879)
Supplement: Supplementary file 1 [file 23042879]

Supplementary Material

A facile preparation of ambient pressure dried hydrophilic silica aerogels and their application in aqueous dye removal

Xianghua Yanga, *, Zhixu Wua, Haifeng Chena, Qixuan Dua, Lin Yua, Ruiyang Zhangb, Ying Zhoub, *

## a Key Laboratory of Clean Chemistry Technology of Guangdong Regular Higher Education Institutions,

## School of Chemical Engineering and Light Industry,

## Guangdong University of Technology,

## Guangzhou, 510006

## b State Key Laboratory of Oil and Gas Reservoir Geology and Exploitation,

## Southwest Petroleum University,

## Chengdu, 610500


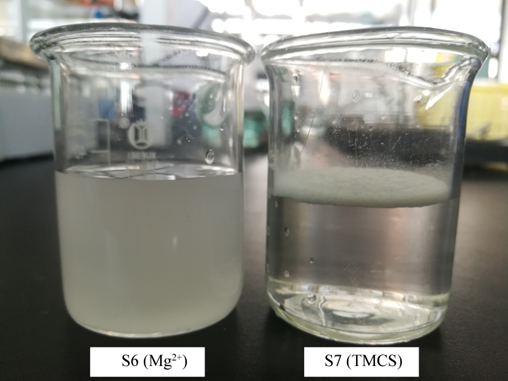


**Figure S1** Photographs of hydrophobicity/hydrophilicity of S6 (Mg2+) and S7 (TMCS) sample.

**Table S1** Dynamic parameters for adsorption of RhB or MB onto SAs samples.

Pseudo-first-order

| Sample | MB | | | RhB | | | |
| --- | --- | --- | --- | --- | --- | --- | --- |
| qe (mg g−1) | k1 (min−1) | R2 | qe (mg g−1) | k1` (min−1) | R2 |
| S1 |  |  | 0.8752 | 1.77 |  | 0.8263 |
| S2 |  |  | 0.7500 | 2.91 |  | 0.6777 |
| S3 |  |  | 0.8489 | 2.00 |  | 0.9905 |
| S4 |  |  | 0.9571 | 2.55 |  | 0.8048 |
| S5 |  |  | 0.9784 | 1.43 |  | 0.6205 |
| S6 |  |  | 0.7174 | 2.81 |  | 0.7192 |
| S7 | 3.63 |  | 0.8184 | 0.68 |  | 0.5890 |

Pseudo-second-order

| Sample | MB | | | | RhB | | |
| --- | --- | --- | --- | --- | --- | --- | --- |
| qe (mg g−1) | k2 (gmg−1 min−1) | R2 | qe (mg g−1) | | k2` (gmg−1 min−1) | R2 |
| S1 |  |  | 0.9999 | 1.77 | |  | 0.9718 |
| S2 |  |  | 0.9990 | 2.91 | |  | 0.9997 |
| S3 |  |  | 0.9982 | 2.00 | |  | 0.9995 |
| S4 |  |  | 0.9999 | 2.55 | |  | 0.9990 |
| S5 |  |  | 0.9999 | 1.43 | |  | 0.9982 |
| S6 |  |  | 0.9999 | 2.81 | |  | 0.9981 |
| S7 | 3.63 | * | * | 0.68 | |  | 0.9379 |

Intra-particle diffusion

| Sample | MB | | | RhB | | | |
| --- | --- | --- | --- | --- | --- | --- | --- |
| qe (mg g−1) | kid (mg g−1 min−0.5) | R2 | qe (mg g−1) | kid` (mg g−1 min−0.5) | R2 |
| S1 |  |  | 0.7700 | 1.77 |  | 0.7232 |
| S2 |  |  | 0.7497 | 2.91 |  | 0.6378 |
| S3 |  |  | 0.892 | 2.00 |  | 0.8645 |
| S4 |  |  | 0.8376 | 2.55 |  | 0.8558 |
| S5 |  |  | 0.8168 | 1.43 |  | 0.6574 |
| S6 |  |  | 0.8078 | 2.81 |  | 0.7389 |
| S7 | 3.63 |  | 0.8308 | 0.68 |  | 0.8792 |

* represent the values of adsorption are negative.
